# Supplementary material for: Bacopa Protects against Neurotoxicity Induced by MPP+ and Methamphetamine
Source: MDPI journal article supplement (doi:10.3390/molecules27165204), 2022-08-15
Supplement: s1 [file s1]

## Supplementary Figures

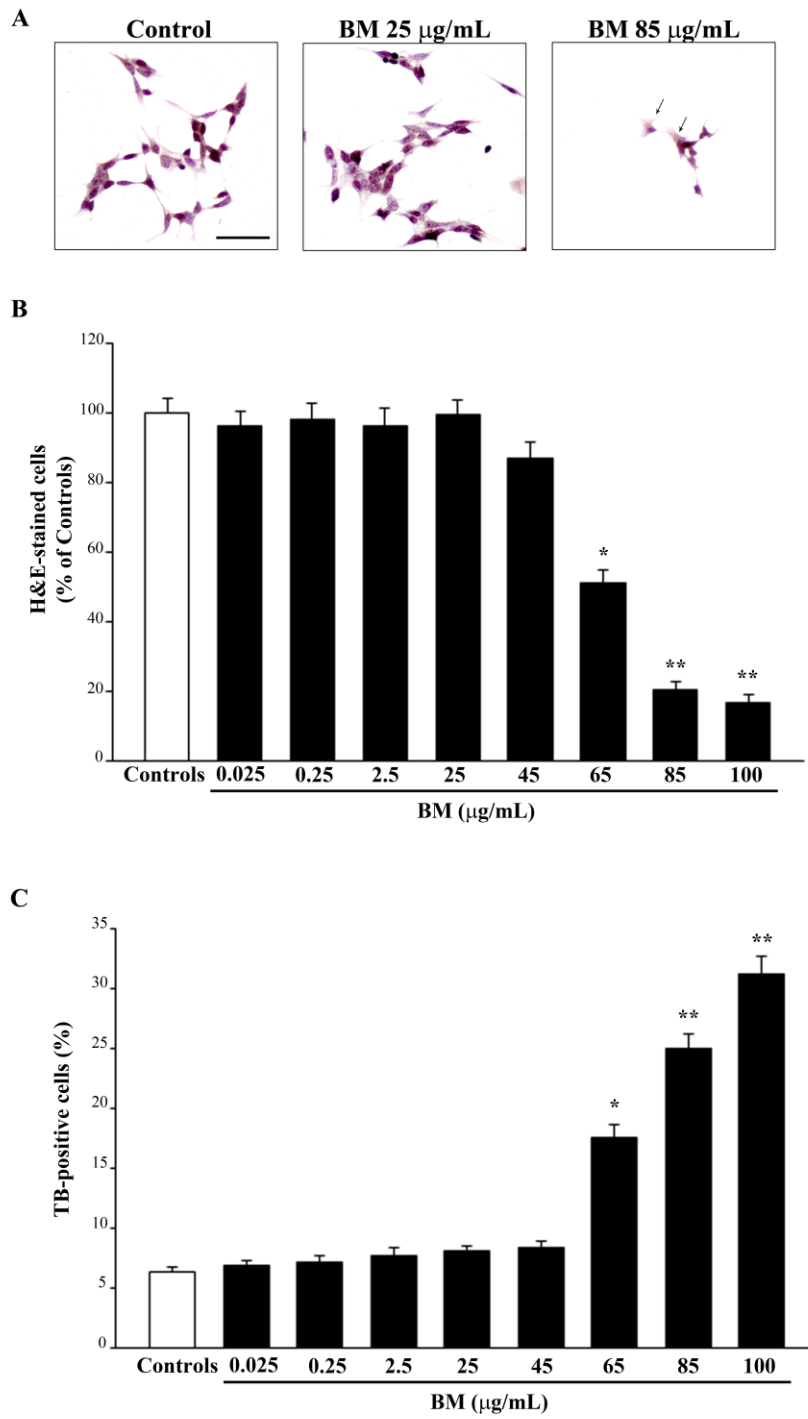

**Supplementary Figure S1.** Dose–response of BM on H&E- and TB-stained SH-SY5Y cells. (A) Representative H&E staining, following increasing doses of BM. Arrows indicate cell alterations induced by high doses of BM. Graphs report the count of (B) H&E- and (C) TB-stained cells following various doses of BM (from 0.025 µg/mL up to 100 µg/mL). Values are given as mean percentage±S.E.M. of cells from three independent experiments. \* $p < 0.05$  compared with controls and BM up to 45 µg/mL; \*\* $p < 0.05$  compared with controls and BM up to 65 µg/mL. Scale bar=38 µm.

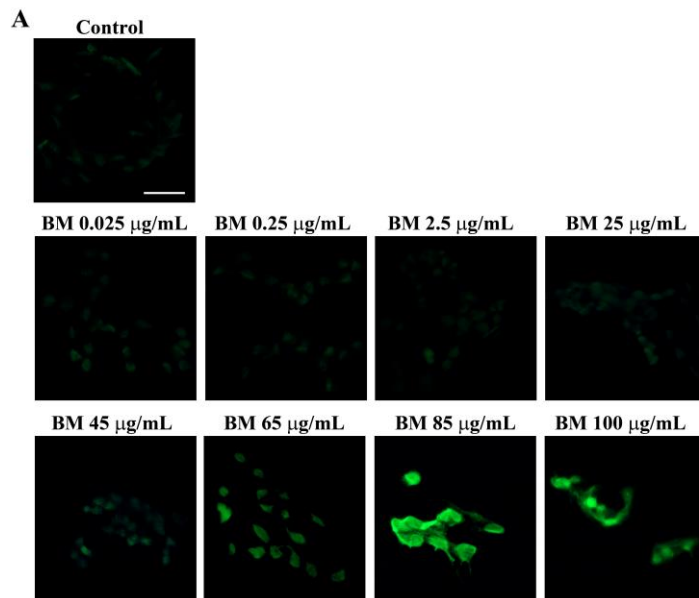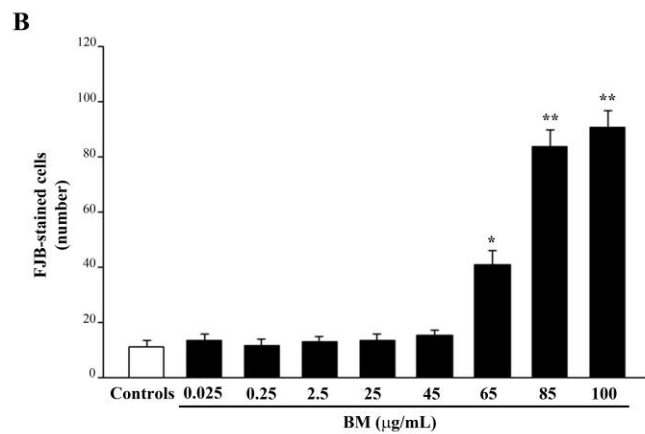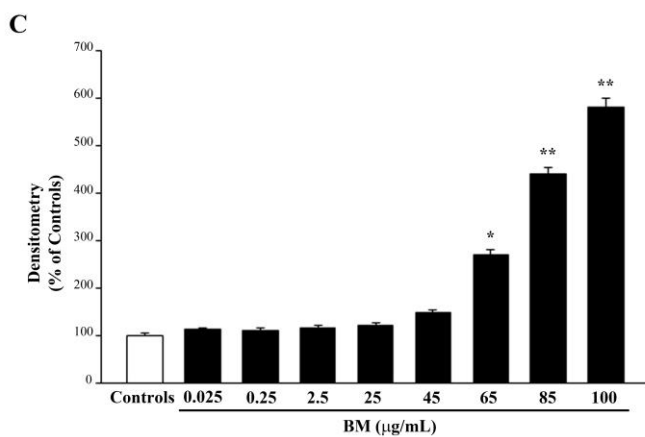

**Supplementary Figure S2.** Dose–response of BM on FJB staining in SH-SY5Y cells. (A) Representative pictures of FJB-stained PC12 cells after treatment with increasing doses of BM (from 0.025 µg/mL up to 100 µg/mL) for 72 h. Arrows indicate cells intensely stained with FJB. The number and the optical density of FJB fluorescent cells are reported in the graphs (B, C, respectively). Values are given as (B) mean±S.E.M. of FJB-positive cells and (C) mean percentage±S.E.M. of optical density (assuming Controls as 100% density) from three independent experiments. \* $p < 0.05$  compared with controls and BM up to 45 µg/mL; \*\* $p < 0.05$  compared with controls and BM up to 65 µg/mL. Scale bar=25 µm.

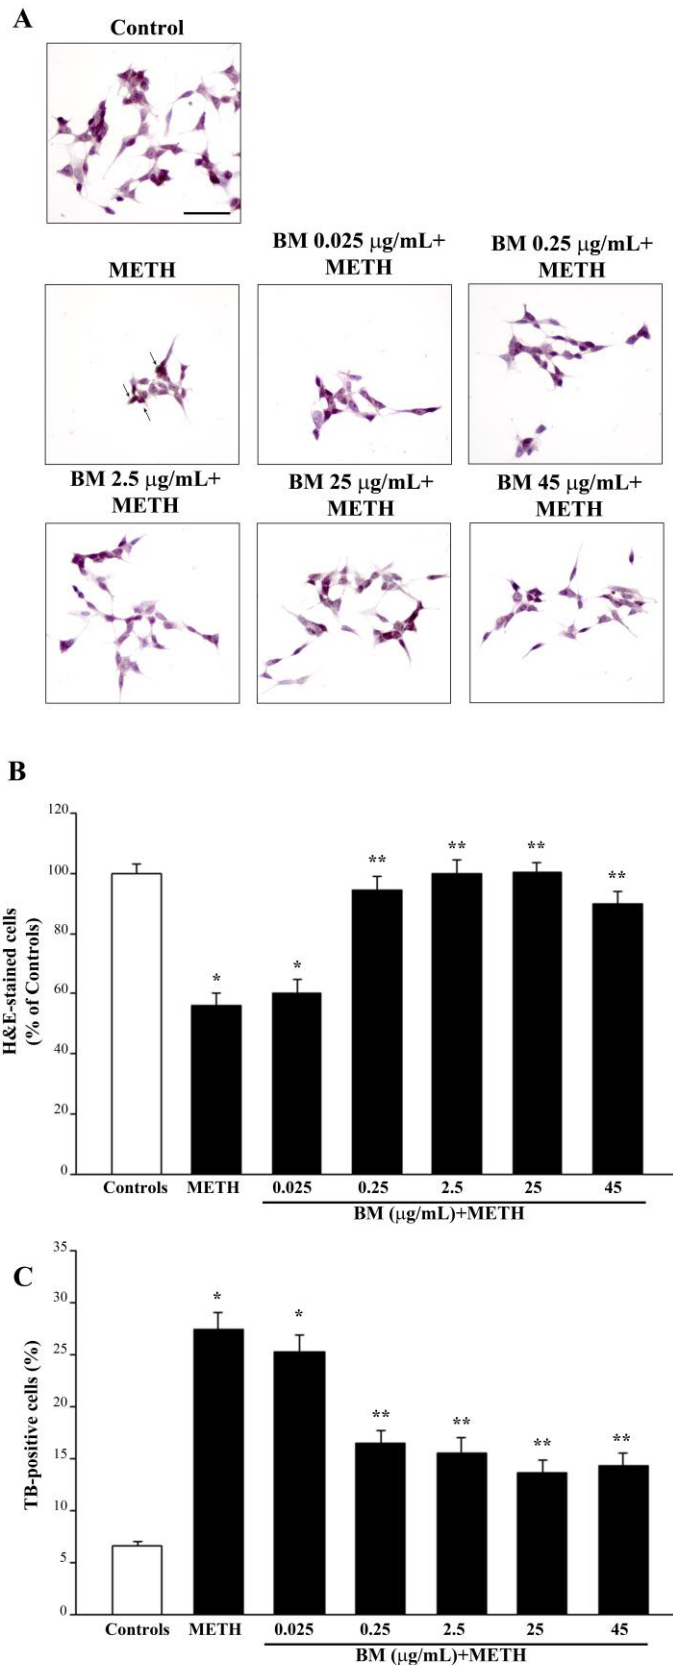

**Supplementary Figure S3.** BM reduces toxicity induced by METH in SH-SY5Y cells. (A) Representative H&E pictures of cells in baseline conditions (control) and following treatment with METH (100  $\mu$ M), alone or in combination with various doses of BM (from 0.025  $\mu$ g/mL up to 45  $\mu$ g/mL). Arrows indicate cell alterations induced by METH. Graphs report the count of (B) H&E- and (C) TB-stained cells. Values are given as the mean percentage  $\pm$  S.E.M. of cells from three independent experiments. \* $p$ <0.05 compared with controls; \*\* $p$ <0.05 compared with METH. Scale bar=38  $\mu$ m.

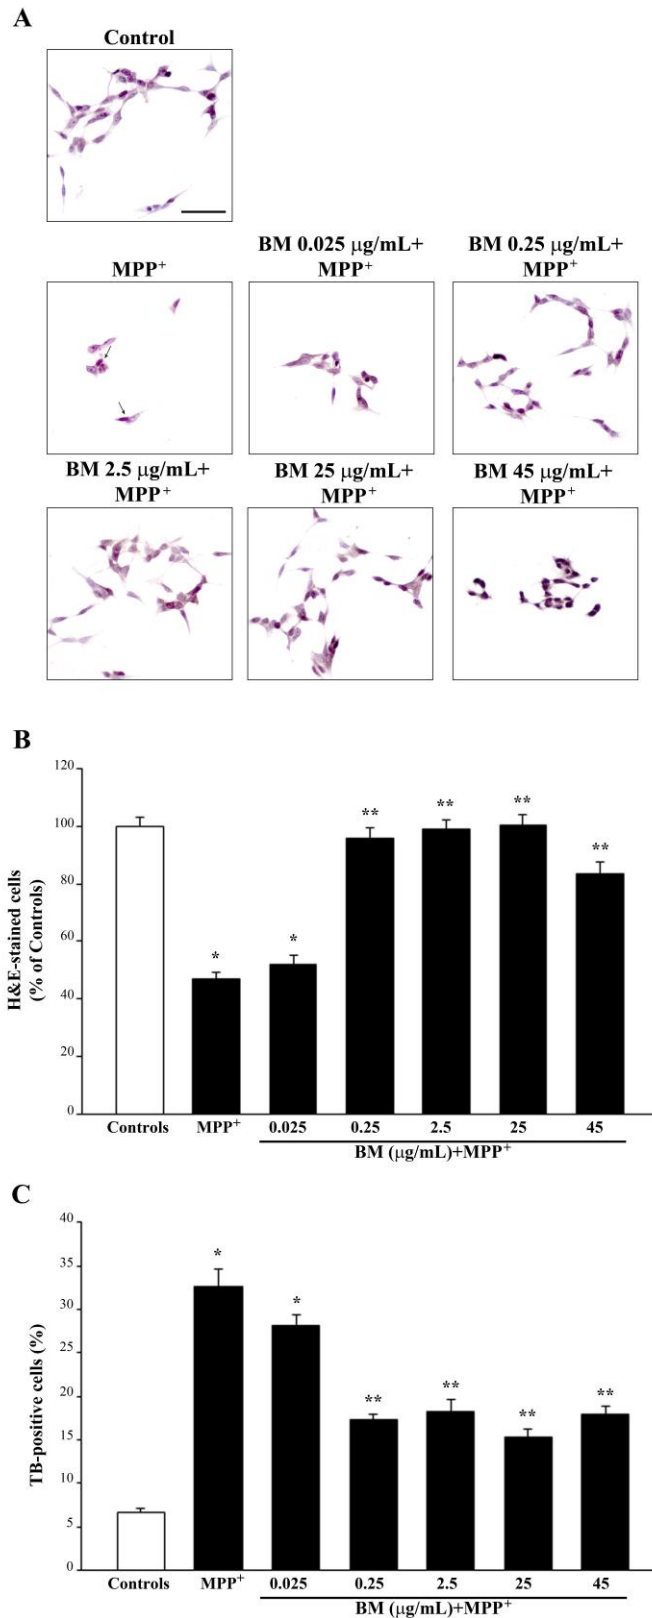

**Supplementary Figure S4.** BM reduces toxicity induced by MPP<sup>+</sup> in SH-SY5Y cells. **(A)** Representative H&E pictures of cells in baseline conditions (control) and following treatment with MPP<sup>+</sup> (100 µM), alone or in combination with various doses of BM (from 0.025 µg/mL up to 45 µg/mL). Arrows indicate cell alterations induced by MPP<sup>+</sup>. Graphs report the count of **(B)** H&E- and **(C)** TB-stained cells. Values are given as the mean percentage  $\pm$  S.E.M. of cells counted in three independent experiments. \* $p < 0.05$  compared with controls; \*\* $p < 0.05$  compared with MPP<sup>+</sup>. Scale bar = 38 µm.

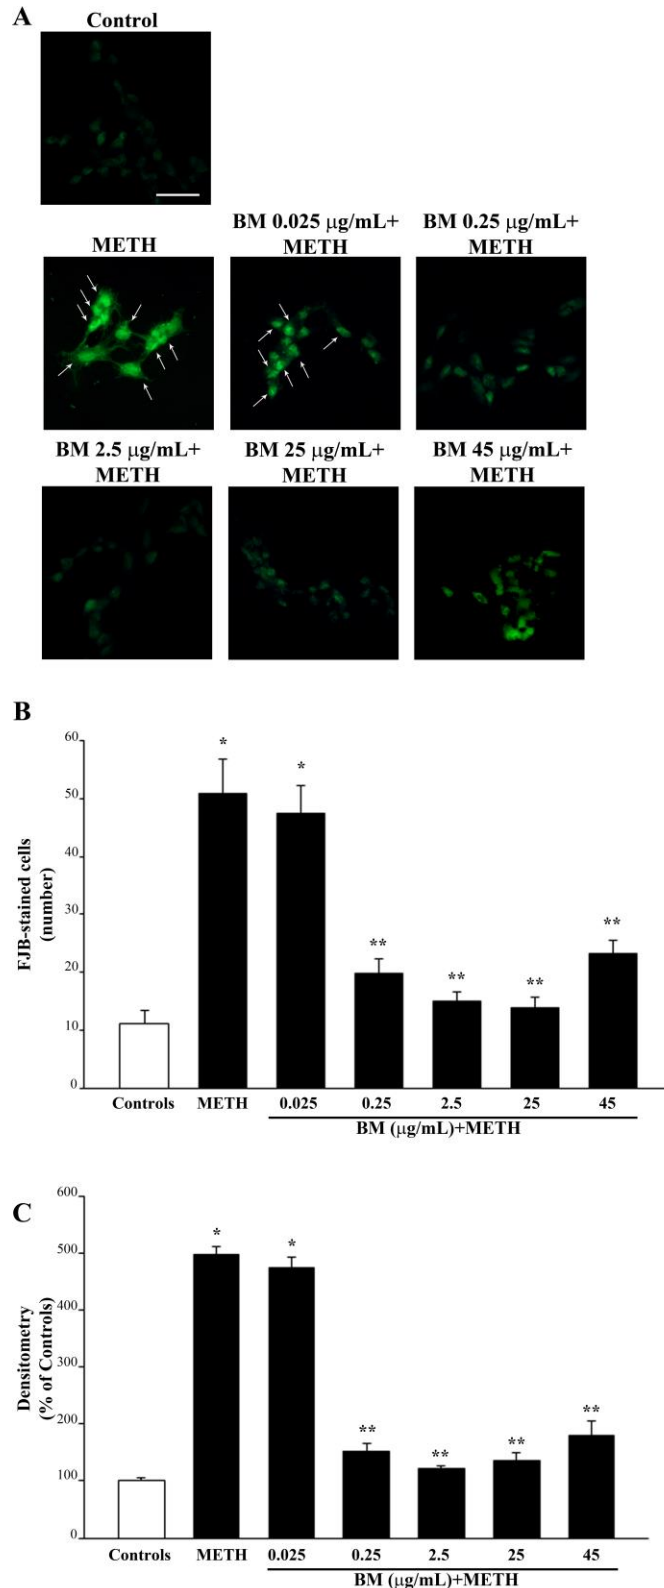

**Supplementary Figure S5.** BM decreases METH-induced FJB staining in SH-SY5Y cells. (A) Representative pictures of FJB-stained cells after METH (100  $\mu\text{M}$ ), alone or in combination with various doses of BM (from 0.025  $\mu\text{g/mL}$  up to 45  $\mu\text{g/mL}$ ). Arrows indicate cells intensely stained with FJB. Graphs report the number (B) and the intensity (C) of FJB fluorescent cells. Values are given as mean  $\pm$  S.E.M (B) or the mean percentage  $\pm$  S.E.M. (assuming controls as 100%, C) of cells from three independent experiments. \* $p < 0.05$  compared with controls; \*\* $p < 0.05$  compared with METH. Scale bar = 25  $\mu\text{m}$ .

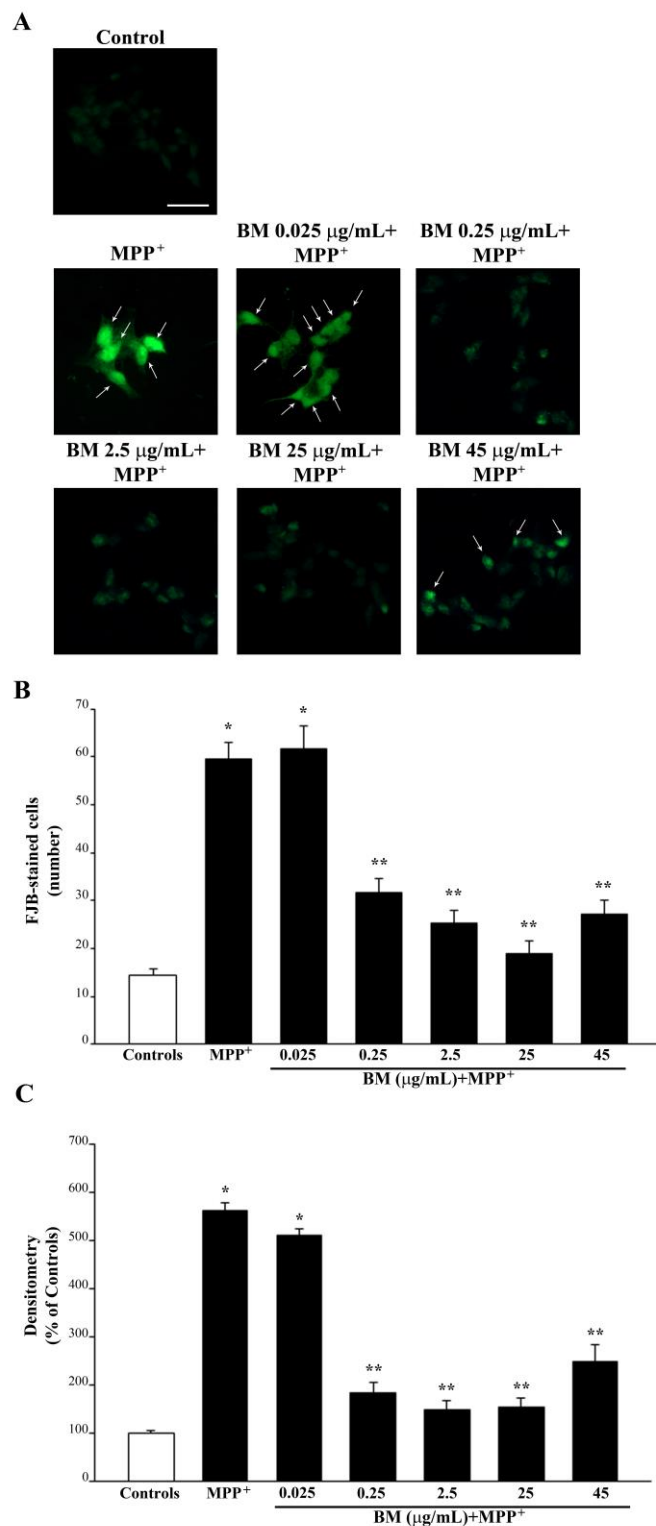

**Supplementary Figure S6.** BM decreases MPP<sup>+</sup>-induced FJB staining in SH-SY5Y cells. **(A)** Representative pictures of FJB-stained cells after MPP<sup>+</sup> (100 µM), alone or in combination with various doses of BM (from 0.025 µg/mL up to 45 µg/mL). Arrows indicate cells intensely stained with FJB. Graphs report the number **(B)** and the intensity **(C)** of FJB fluorescent cells. Values are given as mean ± S.E.M. **(B)** or the mean percentage ± S.E.M. (assuming controls as 100%, **C**) of cells from three independent experiments. \**p*<0.05 compared with controls; \*\**p*<0.05 compared with METH. Scale bar=25 µm.

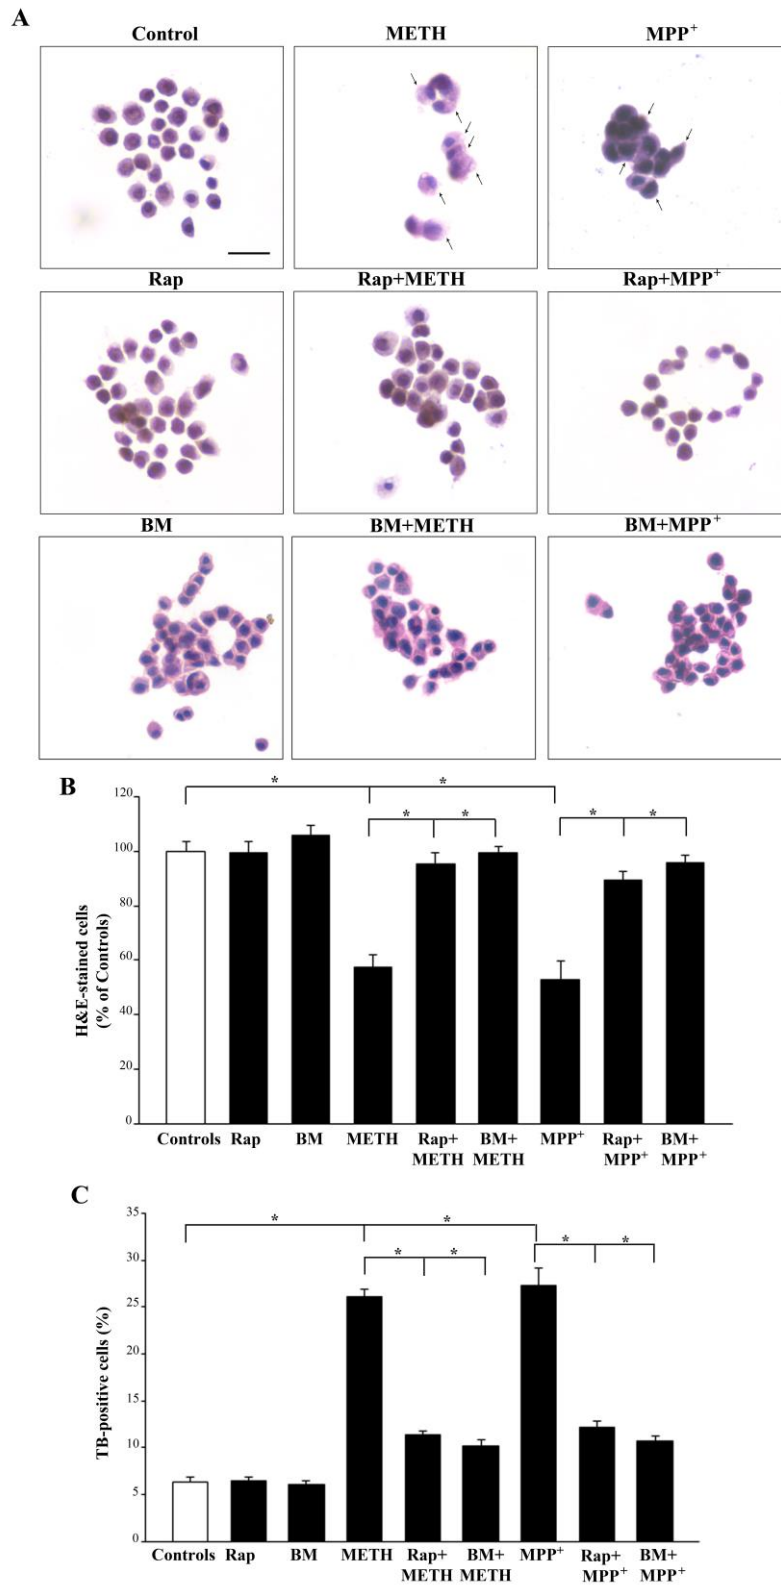

**Supplementary Figure S7.** BM and rapamycin produce comparable neuroprotective effects against METH- and MPP<sup>+</sup>-induced toxicity in PC12 cells. (A) Representative pictures of H&E-stained cells in control conditions and following treatment with METH (100  $\mu$ M) or MPP<sup>+</sup> (100  $\mu$ M), alone or combined with rapamycin (Rap, 100 nM) or BM (25  $\mu$ g/mL). Arrows indicate METH- or MPP<sup>+</sup>-induced morphological alterations. Graphs report the count of (B) H&E- and (C) TB-stained cells. Values are given as the mean percentage  $\pm$  S.E.M. of cells from three independent experiments. \* $p$  < 0.05. Scale bar = 20  $\mu$ m.

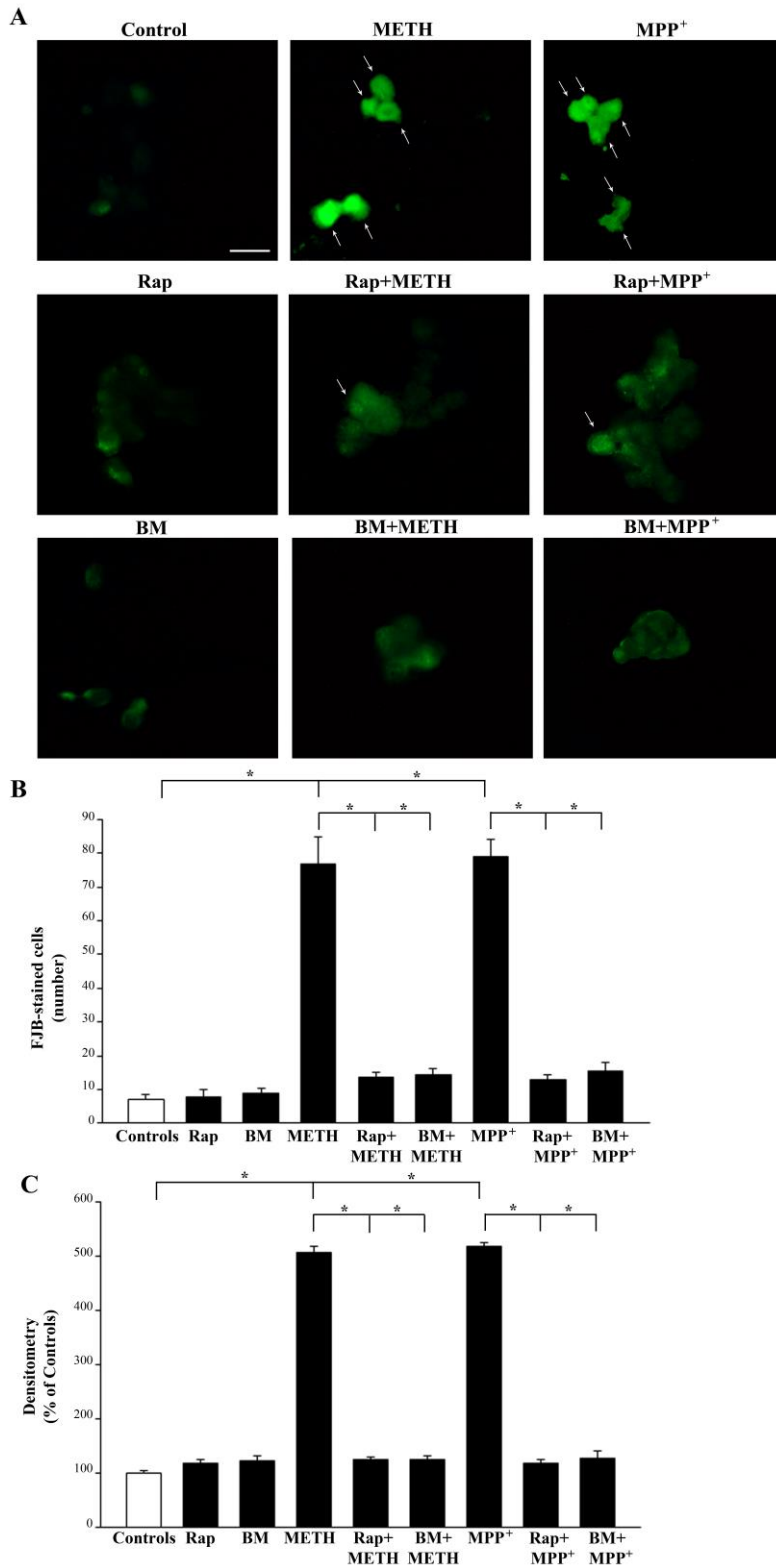

**Supplementary Figure S8.** BM and rapamycin produce comparable reduction of FJB histo-fluorescence induced by METH- or MPP<sup>+</sup> in PC12 cells. **(A)** Representative pictures of FJB-stained cells in control conditions and following METH (100  $\mu$ M) or MPP<sup>+</sup> (100  $\mu$ M) treatment, alone or combined with rapamycin (Rap, 100 nM) or BM (25  $\mu$ g/mL). Arrows indicate cells intensely stained with FJB. Graphs report the number **(B)** and the intensity **(C)** of FJB fluorescent cells. Values are given as mean  $\pm$  S.E.M. **(B)** or the mean percentage  $\pm$  S.E.M. (assuming controls as 100%, **C**) of cells from three independent experiments. \* $p$ <0.05. Scale bar=20  $\mu$ m.



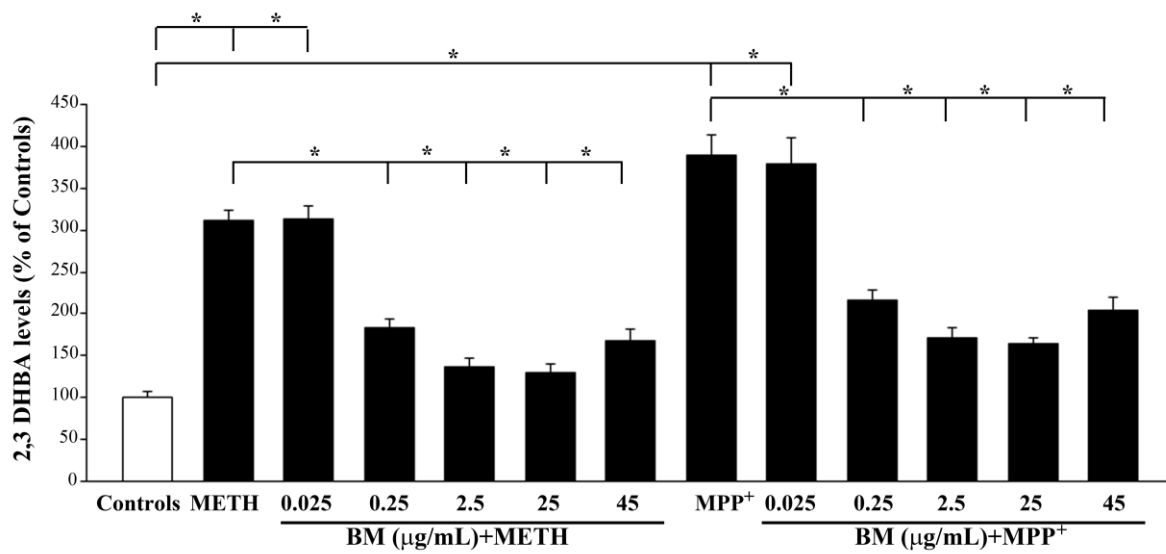

**Supplementary Figure S9.** Low doses of BM decrease METH- and MPP<sup>+</sup>-induced ROS formation in SH-SY5Y cells. The graph reports the levels of 2,3 DHBA produced by combined treatment of BM and METH or MPP<sup>+</sup>. Values are given as the mean percentage  $\pm$  S.E.M. of controls (assuming controls as 100% density). Data are obtained from three independent experiments. \* $p$ <0.05.

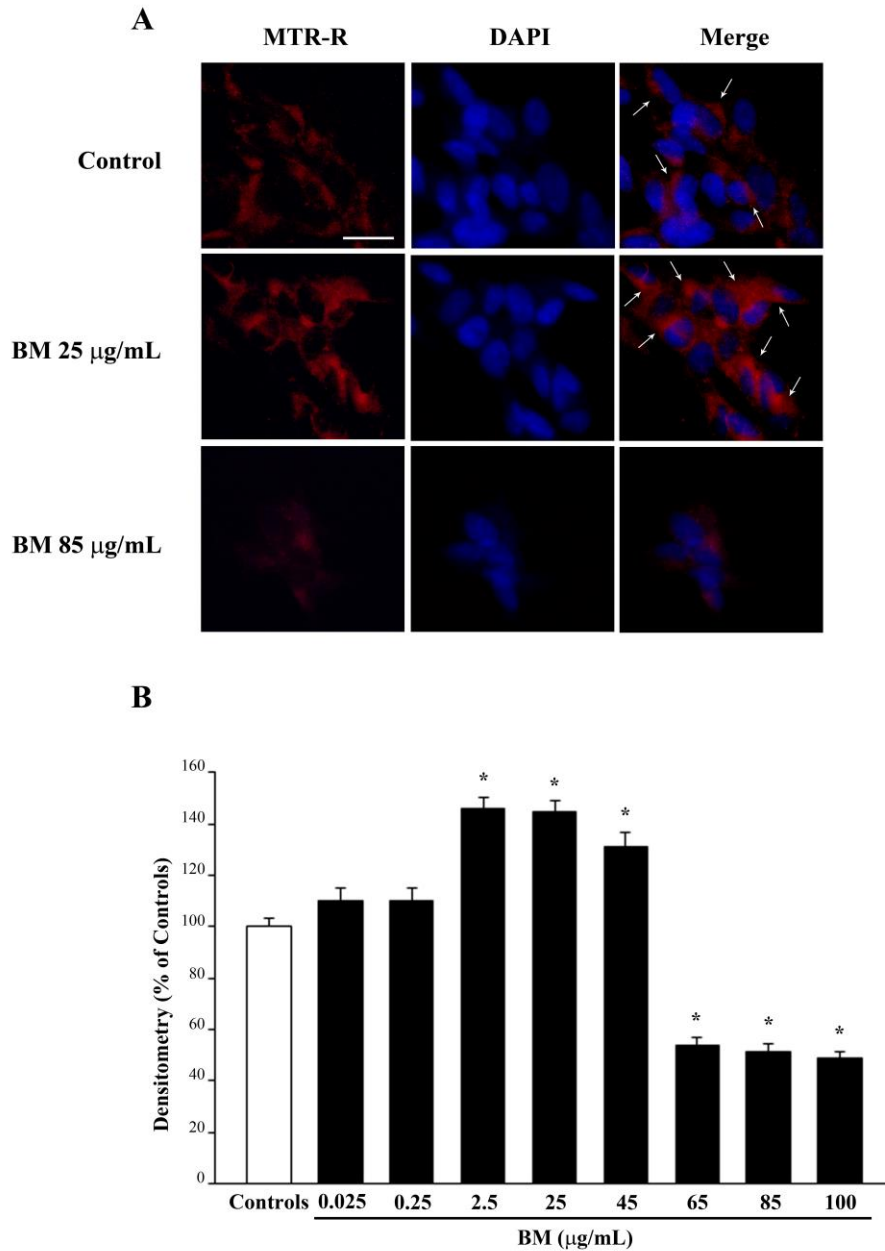

**Supplementary Figure S10.** MitoTracker Red (MTR-R) fluorescence after increasing doses of BM in SH-SY5Y cells. **(A)** Representative pictures show that low doses of BM, at the protective dose of 25  $\mu\text{g/mL}$ , produces an increase of MTR-R fluorescence, while a frankly toxic dose of BM (85  $\mu\text{g/mL}$ ) decreases MTR-R fluorescence below of control. Arrows indicate intensely MTR-R-stained cells. Cell nuclei are stained in blue with DAPI. **(B)** The graph reports the densitometry of MTR-R fluorescence measured in the full range of BM doses used in this work (from 0.025  $\mu\text{g/mL}$  up to 100  $\mu\text{g/mL}$ ). Values are given as mean percentage  $\pm$  S.E.M. of optical density (assuming controls as 100%) from three independent experiments. \* $p < 0.05$  compared with controls. Scale bar = 13  $\mu\text{m}$ .

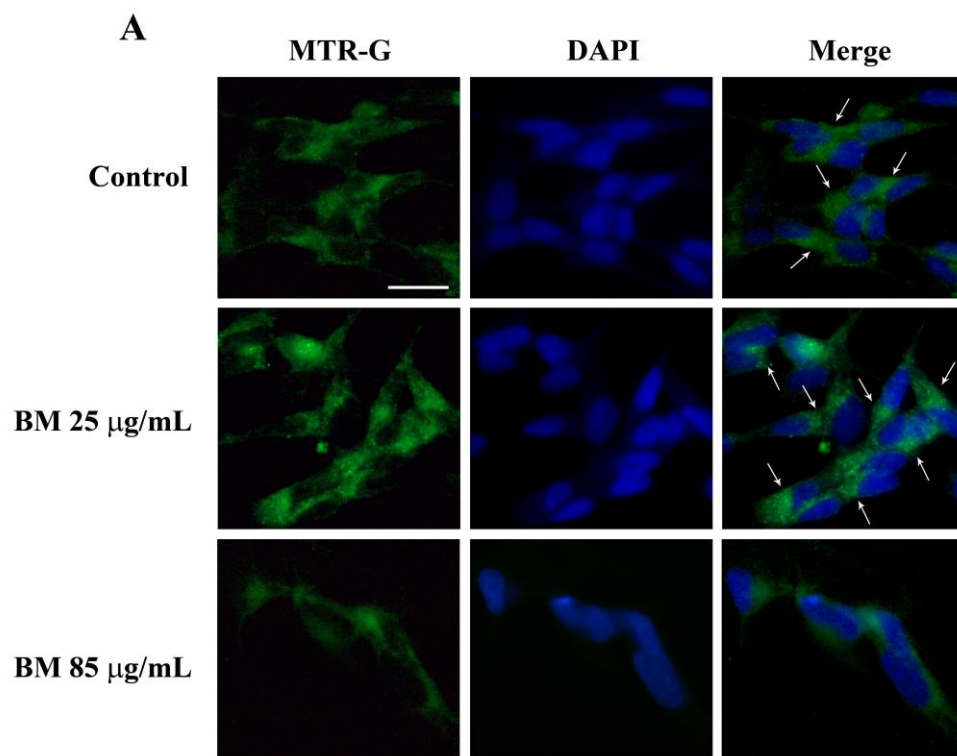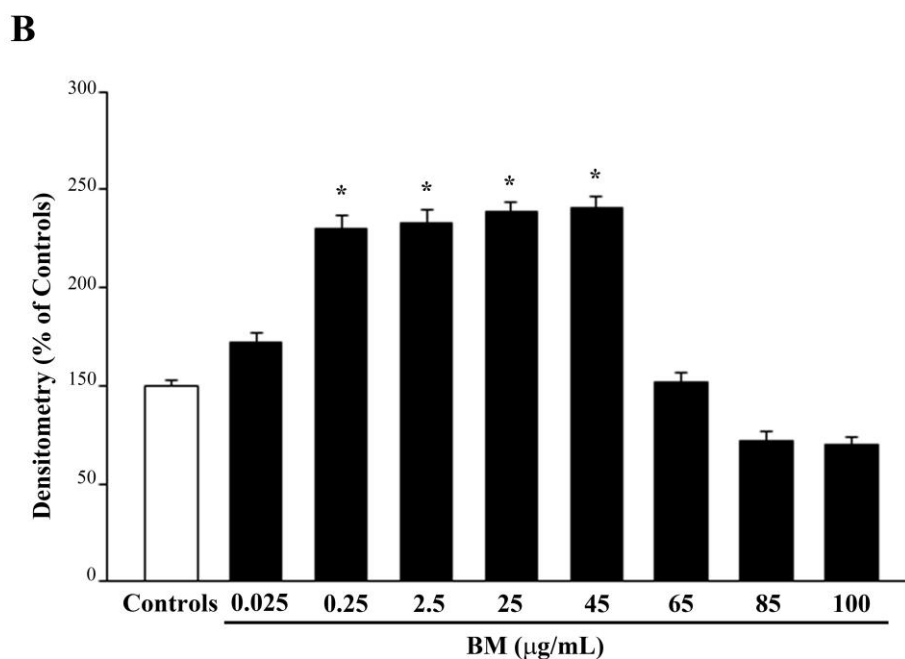

**Supplementary Figure S11.** MitoTracker Green (MTR-G) fluorescence after increasing doses of BM in SH-SY5Y cells. **(A)** Representative pictures show that MTR-G fluorescence is increased by the protective dose of BM (25  $\mu\text{g/mL}$ ), while it is reduced by a frankly toxic dose of BM (85  $\mu\text{g/mL}$ ). Arrows indicate intensely MTR-G-stained cells. Cell nuclei are stained in blue with DAPI. **(B)** The graph reports the densitometry of MTR-G fluorescence measured in the full range of BM doses used in this work (from 0.025  $\mu\text{g/mL}$  up to 100  $\mu\text{g/mL}$ ). Values are given as mean percentage  $\pm$  S.E.M. of optical density

(assuming controls as 100%) obtained from three independent experiments. \* $p<0.05$  compared with controls. Scale bar=13  $\mu\text{m}$ .

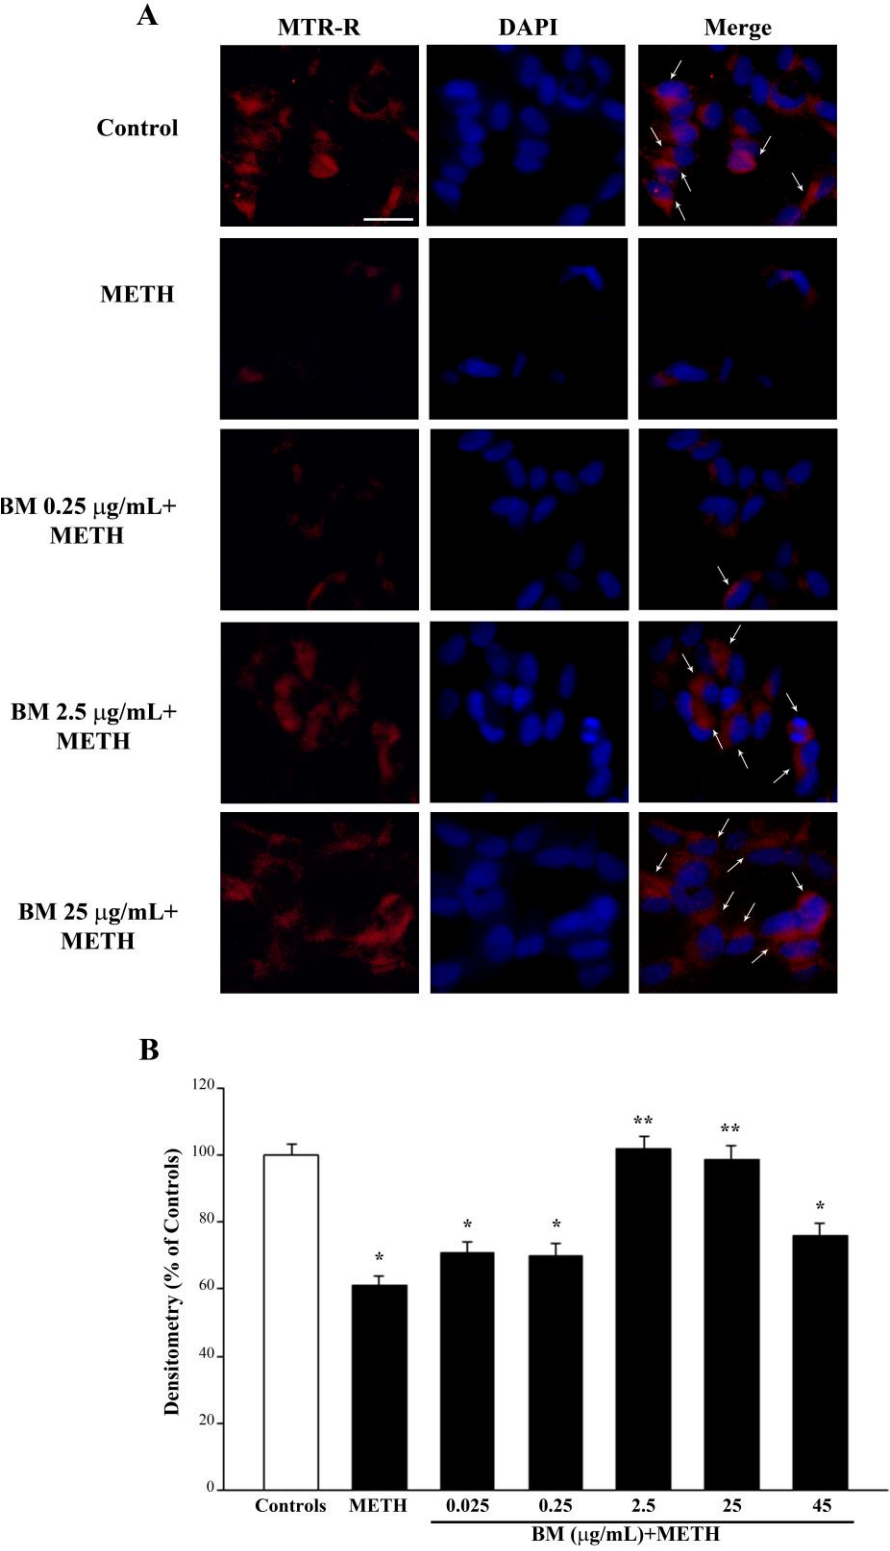

**Supplementary Figure S12.** MitoTracker Red (MTR-R) fluorescence after combined treatments with BM and METH in SH-SY5Y cells. (A) Representative pictures of MTR-R fluorescence show that BM counteracts the reduction of MTR-R

fluorescence induced by METH. Arrows indicate intensely MTR-R fluorescence. Cell nuclei are stained in blue with DAPI. **(B)** The graph reports the MTR-R fluorescence intensity measured for the neuroprotective doses of BM (from 0.025  $\mu\text{g/mL}$  to 45  $\mu\text{g/mL}$ ). Note that the protective effect of BM against METH-induced mitochondrial toxicity, is evident at the doses of 2.5  $\mu\text{g/mL}$  and 25  $\mu\text{g/mL}$ . Values are given as mean percentage $\pm$ S.E.M. of optical density (assuming controls as 100%) from each experimental group from three independent experiments. \* $p<0.05$  compared with controls; \*\* $p<0.05$  compared with METH. Scale bar=13  $\mu\text{m}$ .

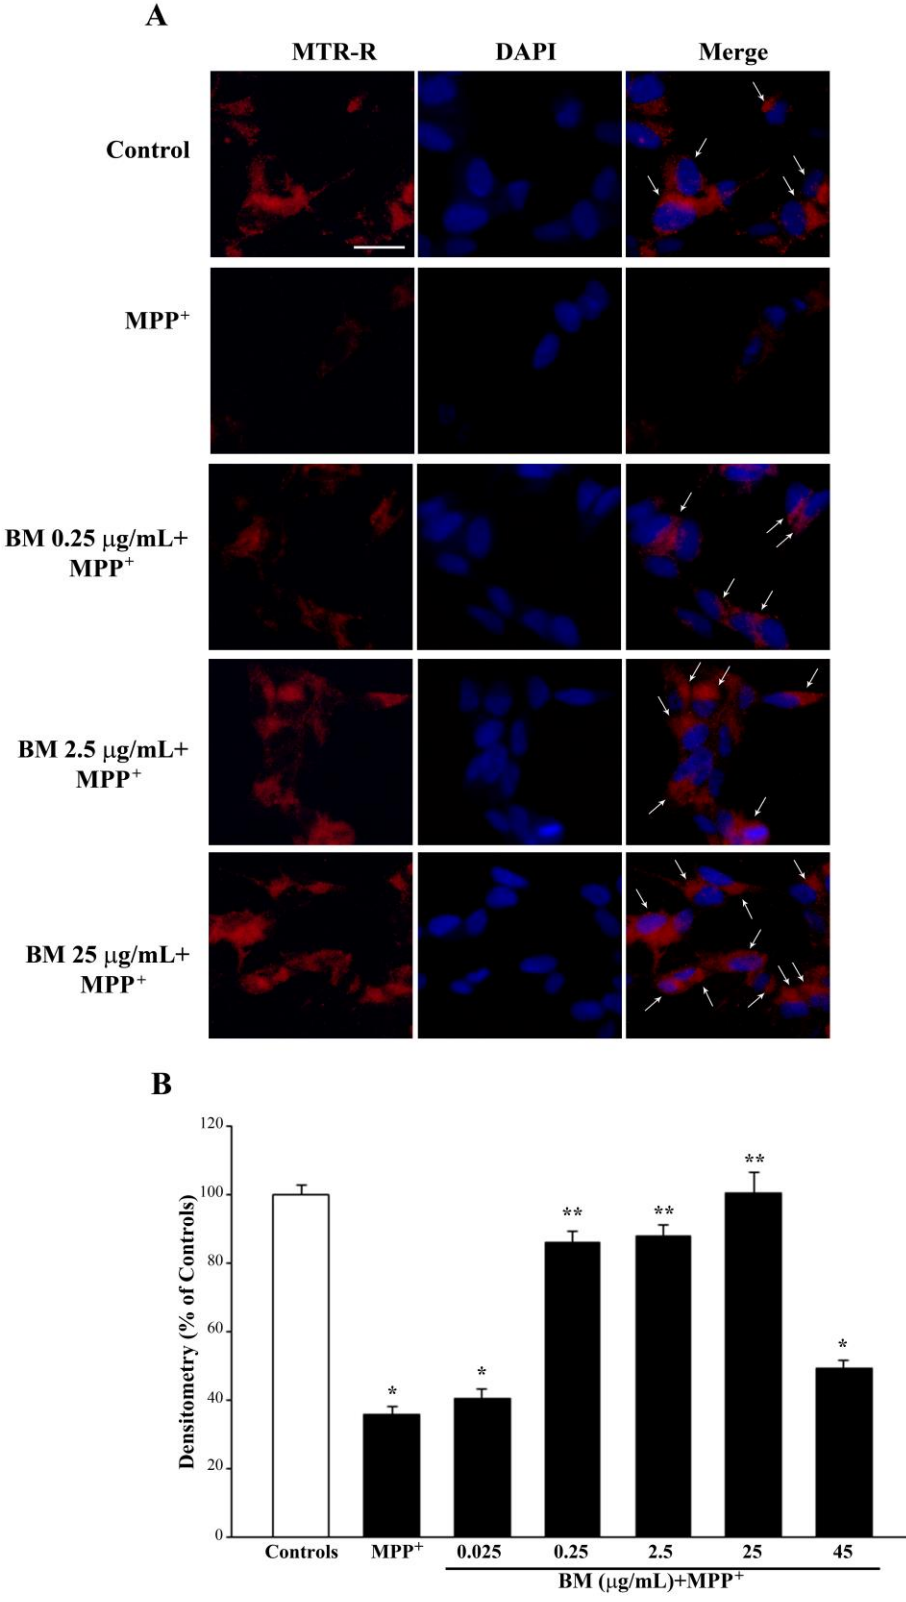

**Supplementary Figure S13.** MitoTracker Red (MTR-R) fluorescent SH-SY5Y cells after combined administration of BM and MPP<sup>+</sup>. **(A)** Representative pictures of MTR-R fluorescence show that BM is protective against the reduction of MTR-R staining induced by MPP<sup>+</sup>. Arrows indicate intensely MTR-R fluorescence. Cell nuclei are stained in blue with DAPI. **(B)** The graph reports the MTR-R fluorescence intensity. Note that the protective effect of BM against the MPP<sup>+</sup>-induced mitochondrial toxicity is already evident for the dose of 0.25  $\mu\text{g/mL}$ . Values are given as the mean percentage $\pm$ S.E.M. of optical density (assuming controls as 100%) from each experimental group obtained from three independent experiments. \* $p$ <0.05 compared with controls; \*\* $p$ <0.05 compared with MPP<sup>+</sup>. Scale bar=13  $\mu\text{m}$ .

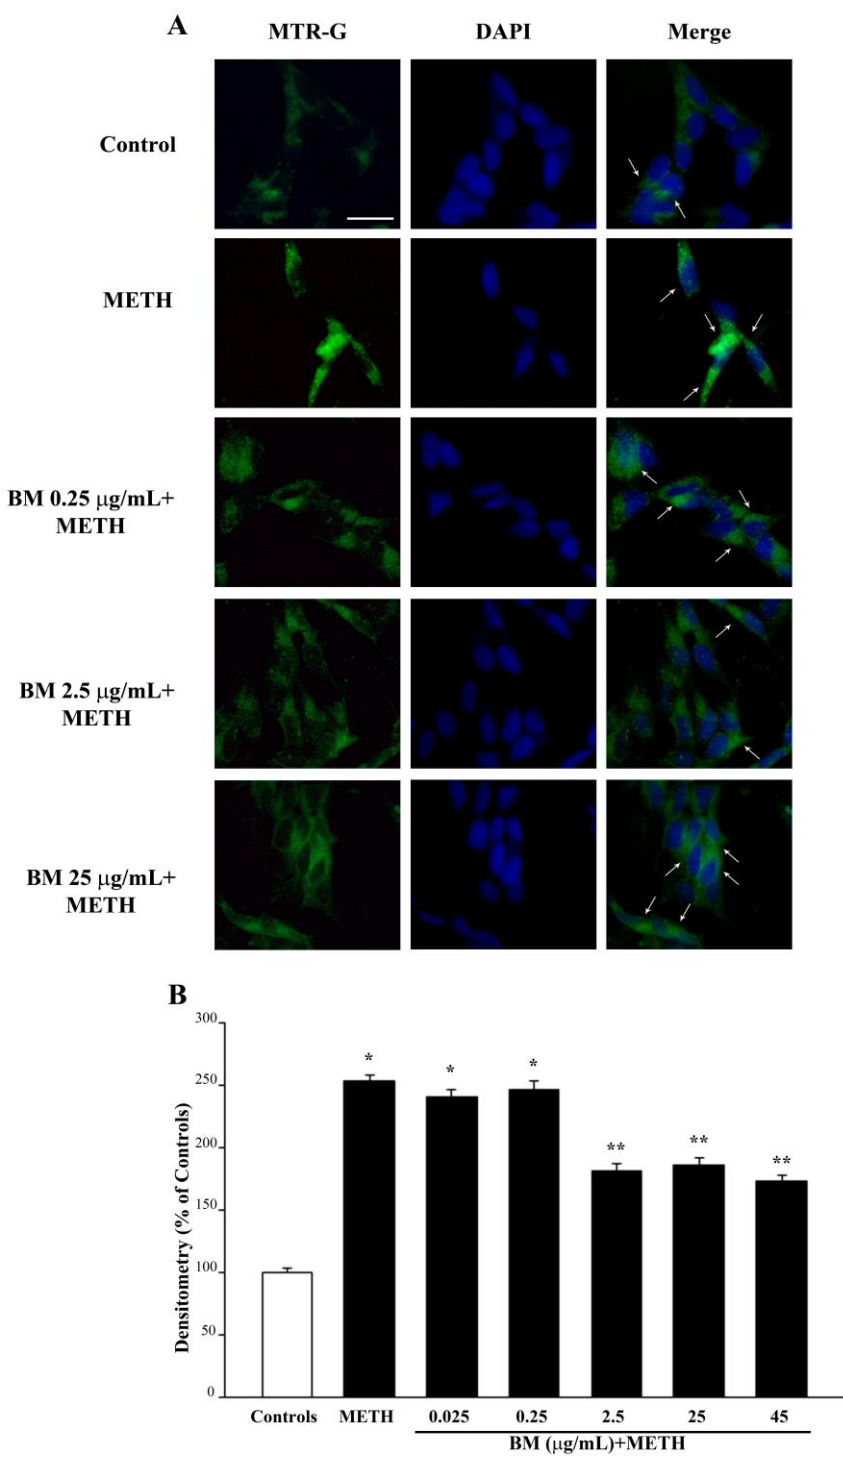

**Supplementary Figure S14.** MitoTracker Green (MTR-G) fluorescent SH-SY5Y cells after combined administration of BM and METH. **(A)** Representative pictures show that METH increases MTR-G fluorescence compared with control. This effect is less pronounced when METH is given in combination with BM. Cell nuclei are stained in blue with DAPI. The graph in

(B), which reports MTR-G fluorescence intensity, indicates that this effect of BM on METH-induced increase of MTR-G fluorescence is evident from the dose of 2.5  $\mu\text{g/mL}$  up to the dose of 45  $\mu\text{g/mL}$ . Values are given as mean percentage $\pm$ S.E.M. of optical density (assuming controls as 100%) from each experimental group from three independent experiments. \* $p$ <0.05 compared with controls; \*\* $p$ <0.05 compared with METH. Scale bar=13  $\mu\text{m}$ .

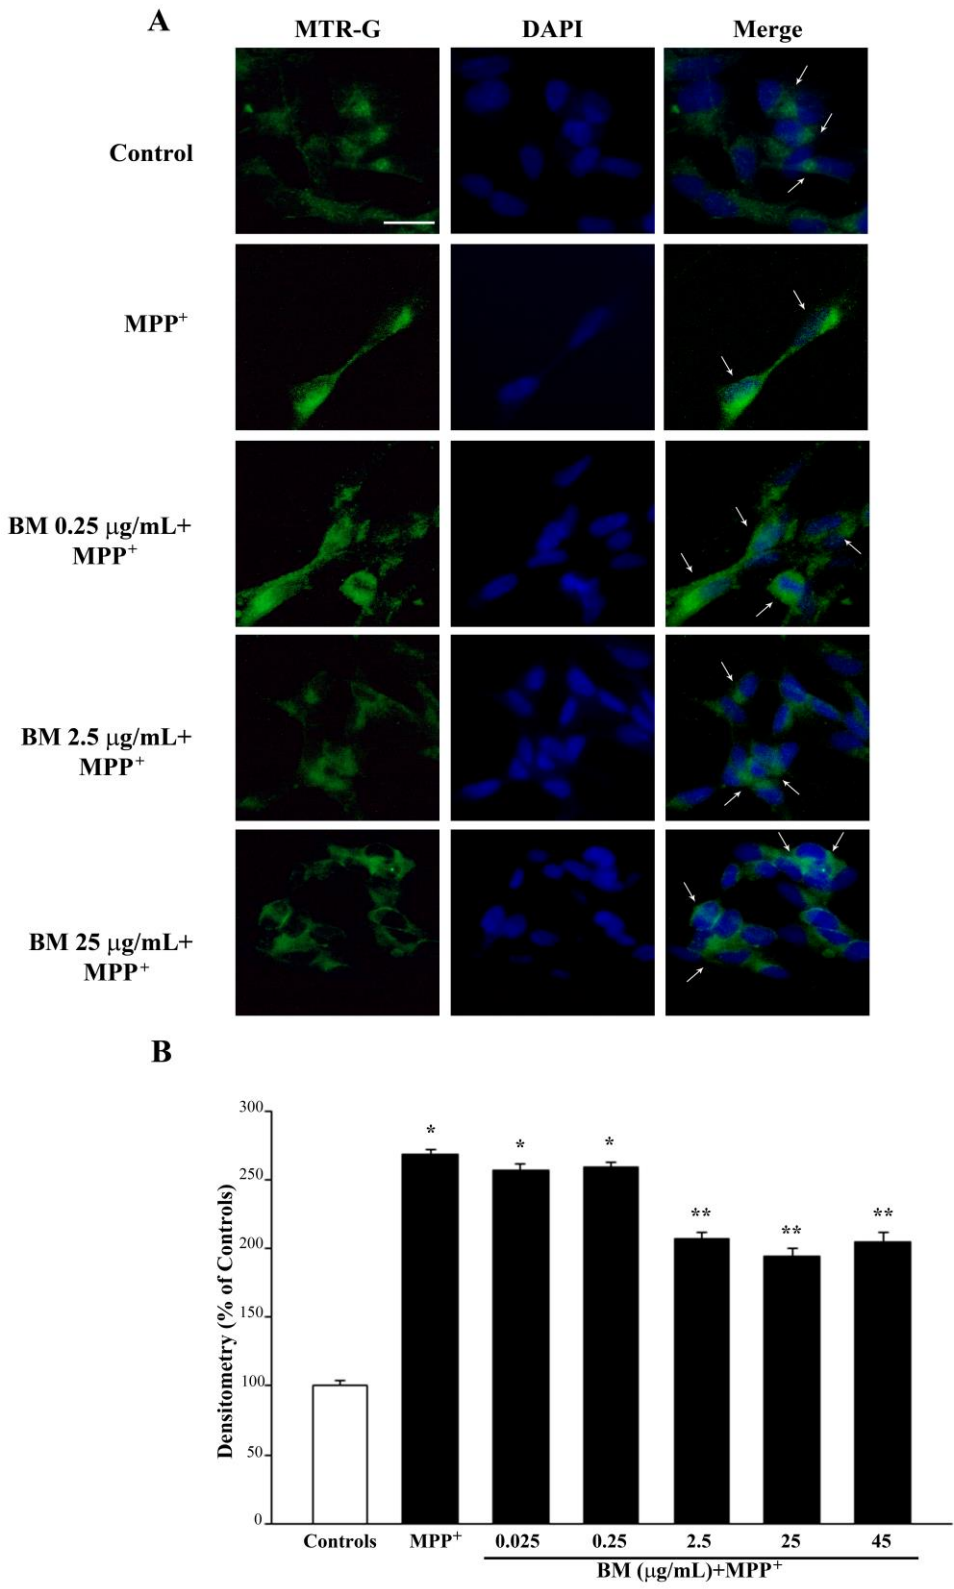

**Supplementary Figure S15.** MitoTracker Green (MTR-G) fluorescent SH-SY5Y cells after combined administration of BM and MPP<sup>+</sup>. (A) Representative pictures of MTR-G fluorescence show that MPP<sup>+</sup> increases MTR-G fluorescence compared with control. This effect is less pronounced when MPP<sup>+</sup> is given in combination with BM. Cell nuclei are stained in blue with DAPI. The graph in (B), which reports the measures of the MTR-G fluorescence intensity, indicates that this effect of BM on MPP<sup>+</sup>-induced increase of MTR-G fluorescence is evident from the dose of 2.5 µg/mL up to the dose of 45 µg/mL. Values are given as mean percentage±S.E.M. of optical density (assuming controls as 100%) from each experimental group from three independent experiments. \**p*<0.05 compared with controls; \*\**p*<0.05 compared with MPP<sup>+</sup>. Scale bar=13 µm.

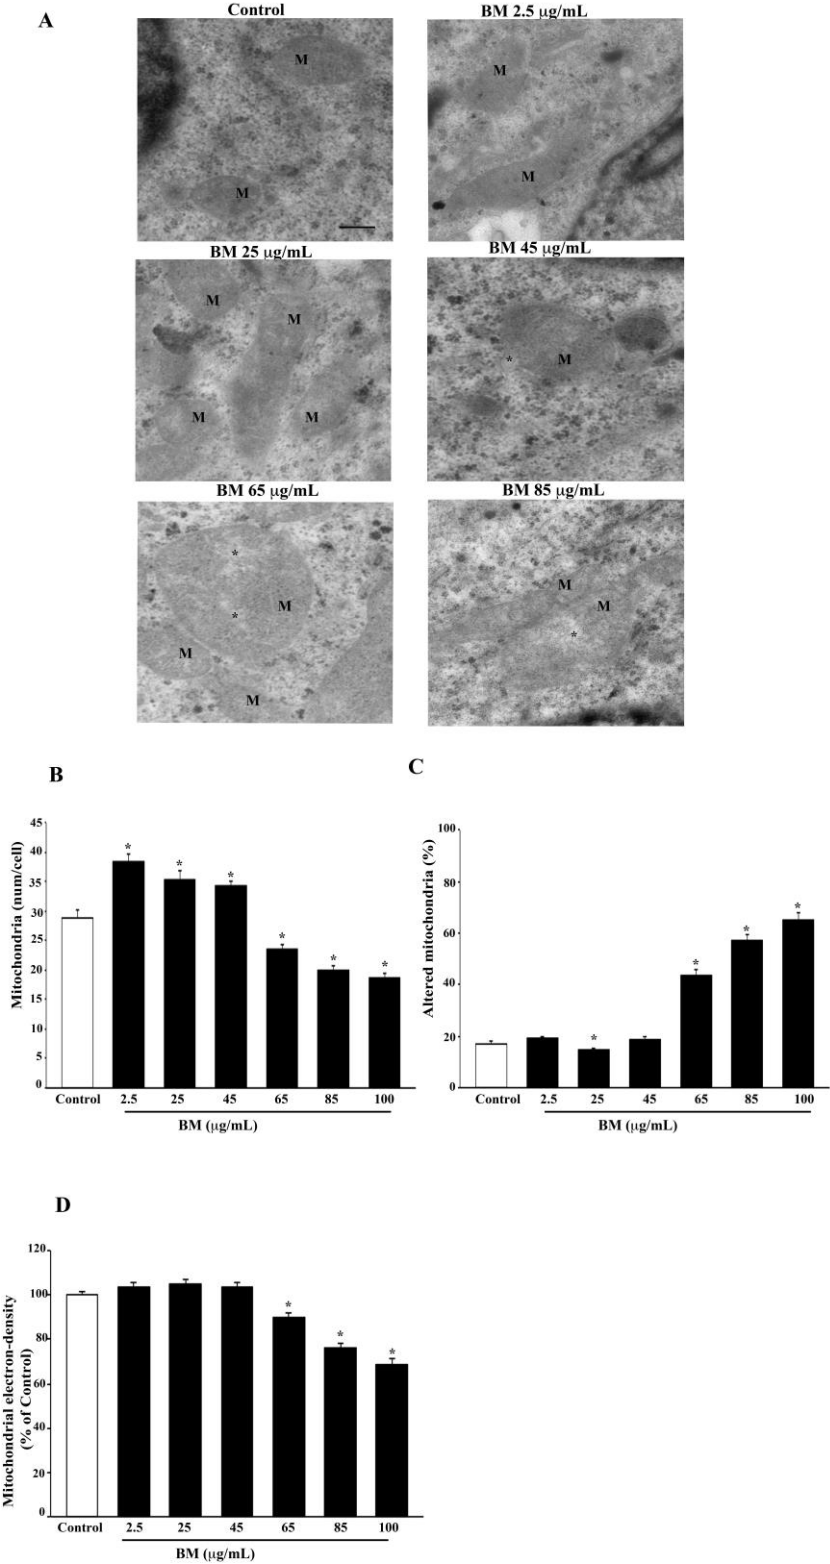



**Supplementary Figure S16.** Effects of increasing doses of BM on mitochondrial ultrastructure of SH-SY5Y cells. (A) Representative micro-graphs show that BM at low doses (i.e. 2.5  $\mu\text{g/mL}$  and 25  $\mu\text{g/mL}$ ) preserves the ultrastructure of mitochondria. In contrast, at the highest doses used (ranging from 65  $\mu\text{g/mL}$  to 85  $\mu\text{g/mL}$ ) BM induces mitochondrial alterations consisting in matrix dilution (\*) and fragmented cristae. M=mitochondria. The graphs report the effects of increasing doses of BM on: (B) the number of total mitochondria per cell, (C) the percentage of altered mitochondria per cell, and (D) the electron-density of mitochondrial matrix. Values are given as the mean $\pm$ S.E.M. (B), mean percentage $\pm$ S.E.M. (C and D) of counts from three independent experiments. \* $p<0.05$  compared with controls. Scale bar=280 nm.

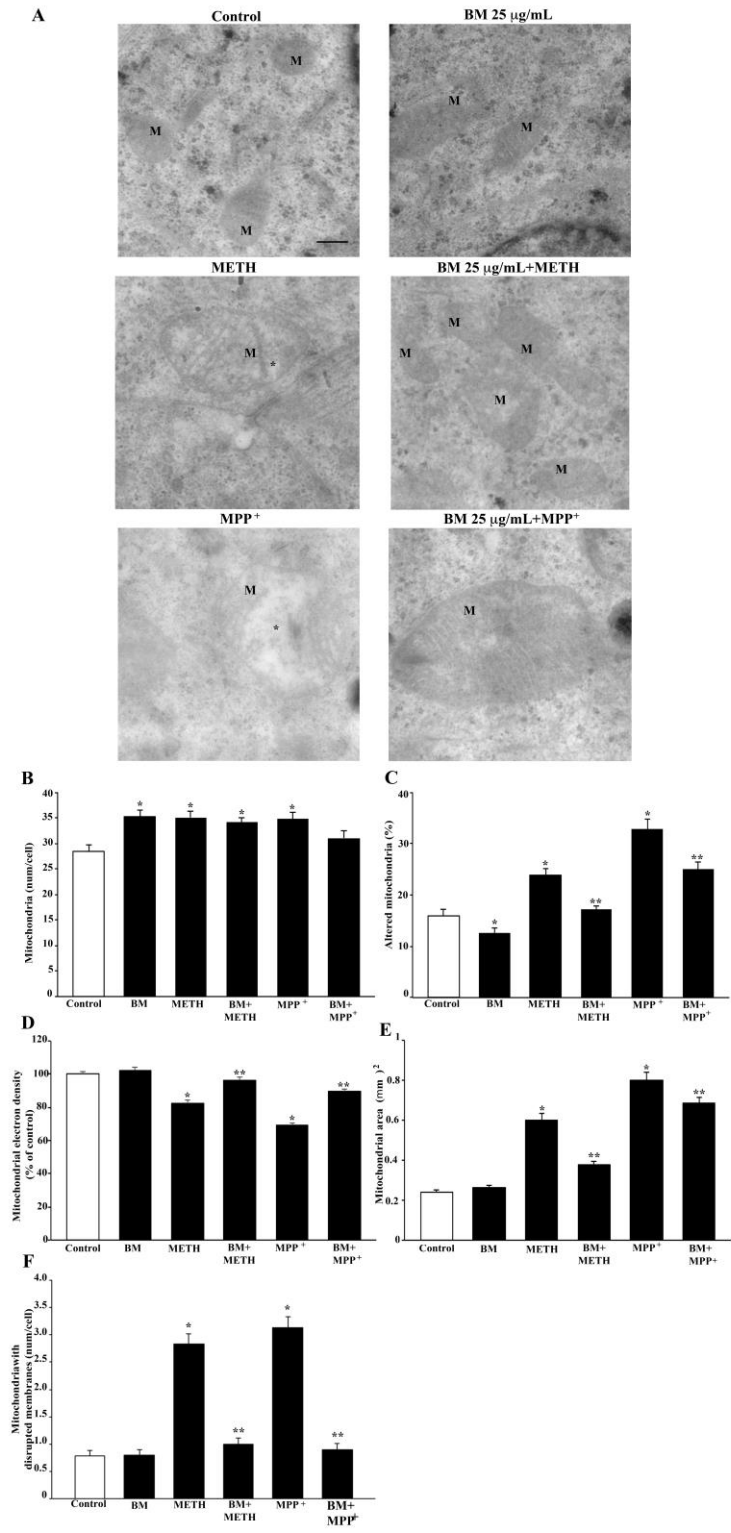

**Supplementary Figure S17.** Effects of combined treatment with BM (25 µg/mL) and METH or MPP<sup>+</sup> on mitochondrial ultrastructural morphometry of SH-SY5Y cells. **(A)** Representative micrographs of mitochondria show that METH induces mitochondrial alteration, consisting of matrix dilution (\*) and fragmented cristae, which are even more severe after MPP<sup>+</sup>, thus confirming what observed in PC12 cells. Pre-treatment with BM (25 µg/mL) counteracts the mitochondrial alterations induced by both neurotoxins. Graphs report the effects of combined BM (25 µg/mL) and METH or MPP<sup>+</sup> treatment on the number of total mitochondria per cell **(B)**, the percentage of altered mitochondria per cell **(C)**, the electron-density of the mitochondrial matrix **(D)** the mitochondrial area **(E)** and the number of mitochondria with disrupted membranes **(F)**. Values are given as the mean±S.E.M. **(B, E and F)**, or mean percentage±S.E.M. **(C and D)** of measures from three independent experiments. \**p*<0.05 compared with controls; \*\**p*<0.05 compared with METH or MPP<sup>+</sup>. M=mitochondria. Scale bar=280 nm.

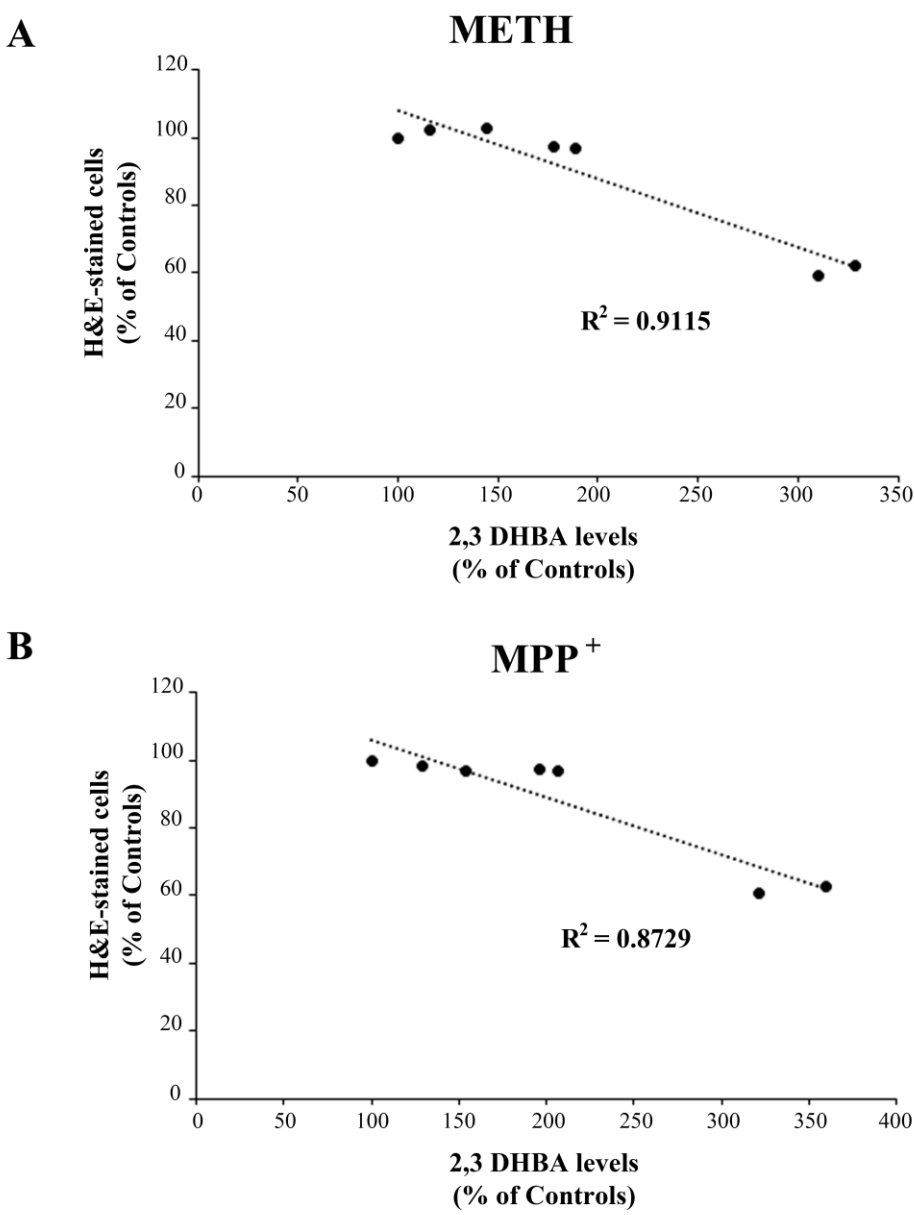

**Supplementary Figure S18.** Direct correlation between 2,3 DHBA levels and METH- or MPP<sup>+</sup>-induced toxicity when using BM. The graphs report the linear regression between the percentage of H&E-positive cells and the percentage of 2,3 DHBA levels, which are measured following METH (100  $\mu$ M, **A**) or MPP<sup>+</sup> (100  $\mu$ M, **B**) exposure for 72 h . This correlation is higher after METH treatments ( $p=0.0008$ ) compared with MPP<sup>+</sup> treatments ( $p=0.0021$ ).

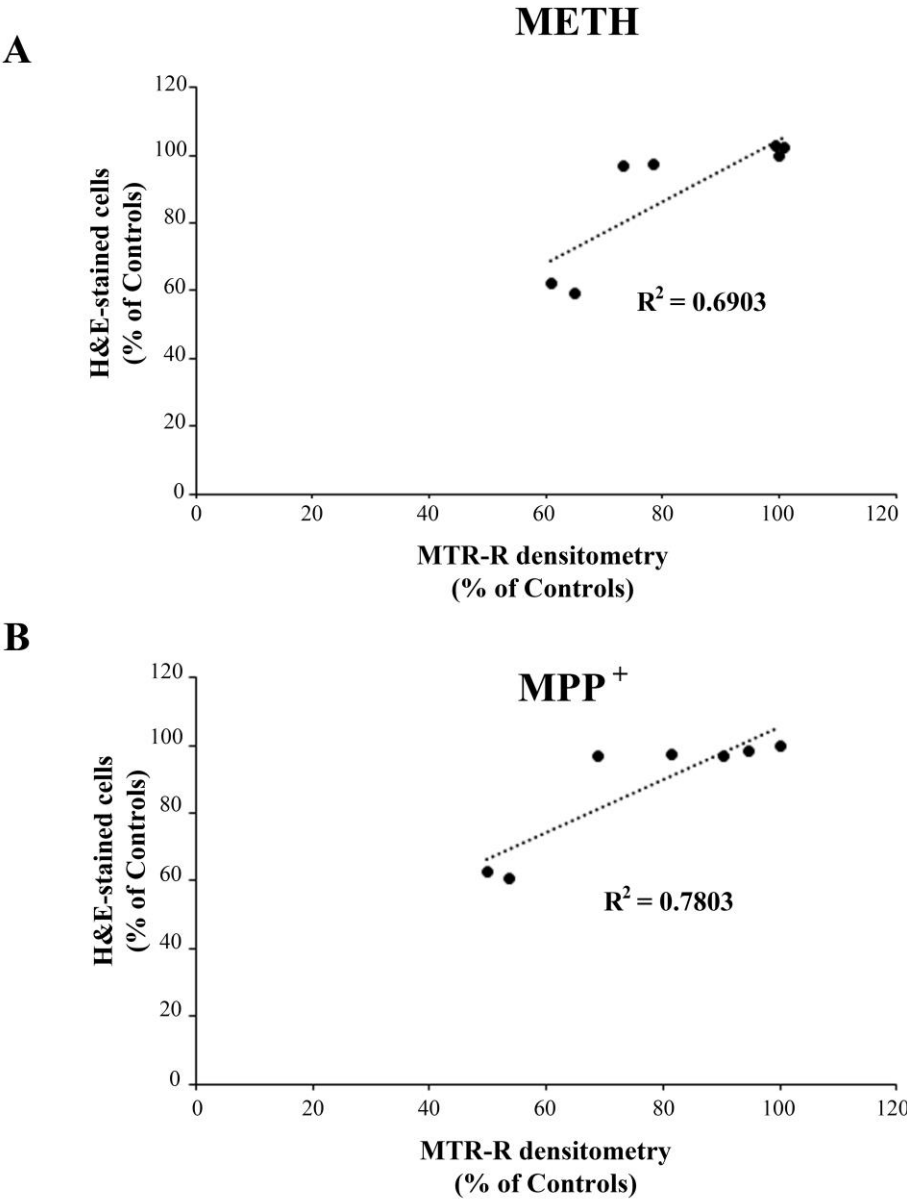

**Supplementary Figure S19.** Direct correlation between MTR-R densitometry and METH- or MPP<sup>+</sup>-induced toxicity when using BM. The graphs report the linear regression between the percentage of H&E-positive cells and the percentage of

MTR-R densitometry, which are measured following METH (100  $\mu$ M, **A**) or MPP<sup>+</sup> (100  $\mu$ M, **B**) exposure for 72 h . This correlation is higher after MPP<sup>+</sup> treatments ( $p=0.0084$ ) compared with METH treatments ( $p=0.0206$ ).
